# Supplementary material
Source: PubMed Central journal article supplement (PMC4524182)
Supplement: JB.00237-15_zjb999093665so1.pdf [file JB.00237-15_zjb999093665so1.pdf]

**Table S1.** Strains used in this study.

| Strain   | Genotype                                                                                           | Reference                                                    |
|----------|----------------------------------------------------------------------------------------------------|--------------------------------------------------------------|
| HM1      | trpC2, pheA1                                                                                       |                                                              |
| HM313    | recA-mGFPmut2-spec                                                                                 | Simmons, <i>Journal of Bacteriology</i> , 2009               |
| HM209    | trpC2, pheA1, $\Delta$ recA-MLS/CAT                                                                | Cheo, <i>Biochimie</i> , 1992                                |
| HM410    | $\Delta$ recO-CAT                                                                                  | Simmons, <i>Journal of Bacteriology</i> , 2009               |
| BKE25280 | trpC2, $\Delta$ recU-MLS                                                                           | Bacillus Genetic Stock Center Koo BM et al. (In preparation) |
| HM430    | trpC2, pheA1, $\Delta$ addAB-Kan                                                                   | Million-Weaver, PNAS, 2015                                   |
| BKE22310 | trpC2, $\Delta$ recO-MLS                                                                           | Bacillus Genetic Stock Center Koo BM et al. (In preparation) |
| HM211    | trpC2, pheA1, thrC::Pxis-lacZ ICEBs1(0) [head-on] MLS <sup>R</sup>                                 | Merrickh, <i>Nature</i> , 2011                               |
| HM352    | trpC2, pheA1, thrC::Pxis-lacZ, ICEBs1(0) [head-on] MLS <sup>R</sup> , recA-mGFPmut2-specR          | Million-Weaver, PNAS, 2015                                   |
| HM 624   | trpC2, pheA1, thrC::Pxis-lacZ [head-on] MLS <sup>R</sup>                                           | Merrickh, <i>Nature</i> , 2011                               |
| HM630    | trpC2, pheA1, thrC::Pxis-lacZ [head-on] MLS <sup>R</sup> , recA-mGFPmut2-spec                      | Million-Weaver, PNAS, 2015                                   |
| HM640    | trpC2, pheA1, thrC::Pxis-lacZ [co-directional] MLS <sup>R</sup> , ICEBs1(0)                        | Million-Weaver, PNAS, 2015                                   |
| HM639    | trpC2, pheA1, thrC::Pxis-lacZ [co-directional] MLS <sup>R</sup>                                    | Million-Weaver, PNAS, 2015                                   |
| HM824    | trpC2, pheA1, thrC::Pxis-lacZ ICEBs1(0) [head-on], $\Delta$ recA-MLS/CAT                           | Million-Weaver, PNAS, 2015                                   |
| HM825    | trpC2, pheA1, thrC::Pxis-lacZ [head-on] MLS <sup>R</sup> , $\Delta$ recA-MLS/CAT                   | This study                                                   |
| HM907    | trpC2, pheA1, thrC::Pxis-lacZ [co-directional] MLS <sup>R</sup> , ICEBs1(0), $\Delta$ recA-MLS/CAT | This study                                                   |
| HM908    | trpC2, pheA1, thrC::Pxis-lacZ [co-directional] MLS <sup>R</sup> , $\Delta$ recA-MLS/CAT            | This study                                                   |
| HM765    | trpC2, pheA1, thrC::Pxis-lacZ ICEBs1(0) [head-on], MLS <sup>R</sup> , $\Delta$ recO-CAT            | This study                                                   |
| HM676    | trpC2, pheA1, thrC::Pxis-lacZ [head-on], MLS <sup>R</sup> , $\Delta$ recO-CAT                      | This study                                                   |

|        |                                                                                                             |            |
|--------|-------------------------------------------------------------------------------------------------------------|------------|
| HM766  | trpC2, pheA1, thrC::Pxis-lacZ [head-on] , MLS <sup>R</sup> , ΔrecO-CAT                                      | This study |
| HM677  | trpC2, pheA1, thrC::Pxis-lacZ [head-on] MLS <sup>R</sup> , recA-mGFPmut2-spec, ΔrecO-CAT                    | This study |
| HM857  | trpC2, pheA1, thrC::Pxis-lacZ ICEBs1(0) [head-on] , MLS <sup>R</sup> , ΔaddAB-Kan                           | This study |
| HM760  | trpC2, pheA1, thrC::Pxis-lacZ, ICEBs1(0) [head-on] , MLS <sup>R</sup> , recA-mGFPmut2-specR, ΔaddAB-Kan     | This study |
| HM770  | trpC2, pheA1, thrC::Pxis-lacZ [head-on], MLS <sup>R</sup> , ΔaddAB-Kan                                      | This study |
| HM667  | trpC2, pheA1, thrC::Pxis-lacZ [head-on] MLS <sup>R</sup> , recA-mGFPmut2-spec, ΔaddAB-Kan                   | This study |
| HM807  | trpC2, pheA1, thrC::Pxis-lacZ ICEBs1(0) [head-on] , MLS <sup>R</sup> , ΔrecO-CAT, ΔaddAB-Kan                | This study |
| HM854  | trpC2, pheA1, thrC::Pxis-lacZ, ICEBs1(0), MLS <sup>R</sup> , recA-mGFPmut2-specR, ΔrecO-CAT, ΔaddAB-Kan     | This study |
| HM808  | trpC2, pheA1, thrC::Pxis-lacZ [head-on] , MLS <sup>R</sup> , ΔrecO-CAT, ΔaddAB-Kan                          | This study |
| HM817  | trpC2, pheA1, thrC::Pxis-lacZ [head-on] MLS <sup>R</sup> , recA-mGFPmut2-spec, ΔrecO-CAT, ΔaddAB-Kan        | This study |
| HM871  | trpC2, pheA1, thrC::Pxis-lacZ [co-directional] MLS <sup>R</sup> , ICEBs1(0), ΔrecO-CAT, ΔaddAB-Kan          | This study |
| HM872  | trpC2, pheA1, thrC::Pxis-lacZ [co-directional] MLS <sup>R</sup> , ΔrecO-CAT, ΔaddAB-Kan                     | This study |
| HM1247 | trpC2, pheA1, thrC::Pxis-lacZ ICEBs1(0) [head-on] , MLS <sup>R</sup> , ΔrecO-CAT, ΔaddAB-Kan, ΔrecA-MLS/CAT | This study |
| HM1246 | trpC2, pheA1, thrC::Pxis-lacZ [head-on] MLS <sup>R</sup> , ΔrecO-CAT, ΔaddAB-Kan, ΔrecA-MLS/CAT             | This study |
| HM1069 | trpC2, pheA1, thrC::Pxis-lacZ ICEBs1(0) [head-on] , MLS <sup>R</sup> , ΔrecU                                | This study |
| HM1076 | trpC2, pheA1, thrC::Pxis-lacZ [head-on] , MLS <sup>R</sup> , ΔrecU                                          | This study |
| HM1146 | trpC2, pheA1, thrC::Pxis-lacZ ICEBs1(0) [head-on] , MLS <sup>R</sup> , ΔrecU, ΔrecA-MLS/CAT                 | This study |
| HM1155 | trpC2, pheA1, thrC::Pxis-lacZ [head-on] , MLS <sup>R</sup> , ΔrecU, ΔrecA-MLS/CAT                           | This study |
| HM1231 | trpC2, pheA1, thrC::Pxis-lacZ ICEBs1(0) [head-on] , MLS <sup>R</sup> , ΔaddAB-Kan, ΔrecU                    | This study |
| HM1090 | trpC2, pheA1, thrC::Pxis-lacZ [head-on], MLS <sup>R</sup> , ΔaddAB-Kan, ΔrecU                               | This study |
| HM1288 | trpC2, pheA1, thrC::Pxis-lacZ ICEBs1(0) [head-on] , MLS <sup>R</sup> , ΔaddAB-Kan, ΔrecU, ΔrecA-MLS/CAT     | This study |
| HM1287 | trpC2, pheA1, thrC::Pxis-lacZ [head-on], MLS <sup>R</sup> , ΔaddAB-Kan,                                     | This study |

|        |                                                                                                                               |            |
|--------|-------------------------------------------------------------------------------------------------------------------------------|------------|
|        | $\Delta$ recU, $\Delta$ recA-MLS/CAT                                                                                          |            |
| HM1085 | trpC2, pheA1, thrC::Pxis-lacZ ICEBs1(0) [head-on], MLS <sup>R</sup> , $\Delta$ recO-CAT, $\Delta$ recU                        | This study |
| HM1089 | trpC2, pheA1, thrC::Pxis-lacZ [head-on], MLS <sup>R</sup> , $\Delta$ recO-CAT, $\Delta$ recU                                  | This study |
| HM1304 | trpC2, pheA1, thrC::Pxis-lacZ ICEBs1(0) [head-on], MLS <sup>R</sup> , $\Delta$ recO-CAT, $\Delta$ recU, $\Delta$ recA-MLS/CAT | This study |
| HM1302 | trpC2, pheA1, thrC::Pxis-lacZ [head-on], MLS <sup>R</sup> , $\Delta$ recO-CAT, $\Delta$ recU, $\Delta$ recA-MLS/CAT           | This study |
| HM1305 | trpC2, pheA1, thrC::Pxis-lacZ ICEBs1(0) [head-on], MLS <sup>R</sup> , $\Delta$ recO-CAT, $\Delta$ recU, $\Delta$ addAB-Kan    | This study |
| HM1138 | trpC2, pheA1, thrC::Pxis-lacZ [head-on], MLS <sup>R</sup> , $\Delta$ recO-CAT, $\Delta$ recU, $\Delta$ addAB-Kan              | This study |

### Supplemental Figure 1

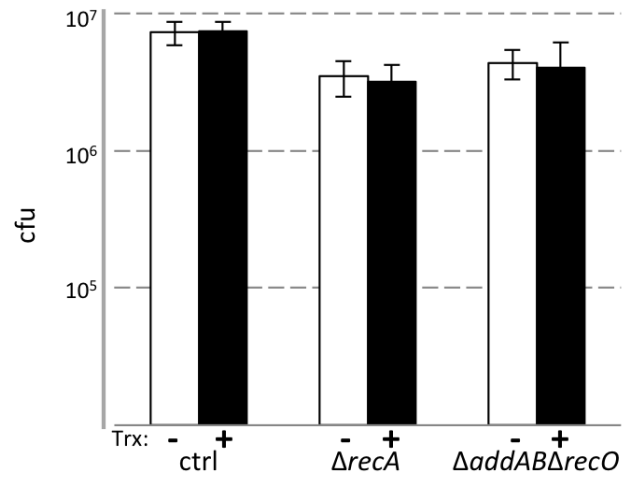

**A)** Colony forming units arising from exponentially growing cultures at  $OD_{600}=0.3$  were enumerated in the presence (Trx +, black bars) and absence (Trx -, white bars) of transcription from  $P_{xis}$ -*lacZ* for strains harboring the construct in the co-directional orientation.

## Supplemental Figure 2

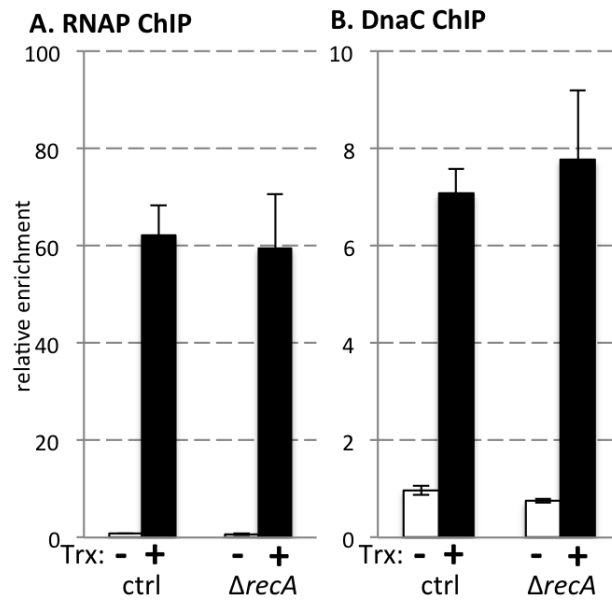

**A)** Relative association of RNA polymerase with the head-on gene-containing region. **B)** Relative association of the replicative helicase, DnaC, with the head-on gene-containing region. Data shown represents averages of 3 biological replicates. Error bars represent standard errors of the means.
